# Supplementary material for: Adaptation of an eHealth Intervention: iSupport for Carers of People with Rare Dementias
Source: MDPI journal article supplement (doi:10.3390/ijerph21010047), 2023-12-28
Supplement: s1 [file s1]

**Standards for Reporting Qualitative Research (SRQR) Table**

| <b>SRQR Headings</b>                        | <b>Description</b>                                                                                                           | <b>Page Numbers</b>                                           |
|---------------------------------------------|------------------------------------------------------------------------------------------------------------------------------|---------------------------------------------------------------|
| Title                                       | Concise description of the study topic identifying the study as qualitative, indicating approach, or data collection methods | Title...                                                      |
| Abstract                                    | Summary of key elements of the study                                                                                         | Abstract: Page 1                                              |
| Problem formulation                         | Description and significance of the problem; review of relevant theory and empirical work; problem statement                 | Introduction: Pages 4-6                                       |
| Purpose or research question                | Purpose of the study and specific objectives or questions                                                                    | Introduction: Pages 4-6                                       |
| Qualitative approach and research paradigm  | Qualitative approach, guiding theory, and rationale                                                                          | Methods: Pages 6-8                                            |
| Researcher characteristics and reflexivity  | Researchers' characteristics that may influence the research                                                                 | Data analysis: Page 13                                        |
| Context                                     | Setting and salient contextual factors                                                                                       | Discussion: Pages 24-28                                       |
| Sampling strategy                           | How and why participants were selected; criteria for deciding when no further sampling was necessary                         | Recruitment: Pages 9-10<br>Discussion: Page 27                |
| Ethical issues pertaining to human subjects | Documentation of approval by an appropriate ethics review board and participant consent                                      | Ethics & consent procedures: Pages 9-10                       |
| Data collection methods                     | Types of data collected and details of data collection procedures                                                            | Phase 1- Methods: Pages 10-13<br>Phase 3-Methods: Pages 22-23 |

|                                                            |                                                                                                                                                                      |                                                                                             |
|------------------------------------------------------------|----------------------------------------------------------------------------------------------------------------------------------------------------------------------|---------------------------------------------------------------------------------------------|
| Data collection instruments and technologies               | Description of instruments and devices used for data collection                                                                                                      | Phase 1- Focus groups: Pages 7-9<br>Phase 3-Methods: Pages 22-23                            |
| Data processing                                            | Methods for processing data before and during analysis                                                                                                               | Data analysis: Page 12                                                                      |
| Data analysis                                              | Process by which themes were identified and the researchers involved in data analysis                                                                                | Data analysis: Pages 12-13                                                                  |
| Techniques to enhance trustworthiness                      | Techniques to enhance trustworthiness and credibility of data analysis                                                                                               | Data analysis: Pages 12-13                                                                  |
| Units of study                                             | Number and relevant characteristics of participants and level of participation (can be reported in results)                                                          | Phase 1- Results: Page 14<br>Phase 3- Results: Page 24                                      |
| Synthesis and interpretation                               | Main findings, which may include development of a theory or model                                                                                                    | Phase 1- Results: Page 14<br>Phase 2- Adaptations: Pages 17-22<br>Phase 3- Results: Page 24 |
| Links to empirical data                                    | Evidence to substantiate findings (e.g., quotes)                                                                                                                     | Phase 2- Adaptations: Pages 17-22                                                           |
| Integration with prior work, implications, transferability | Summary of findings, explanation of how findings connect to conclusions of earlier scholarship, discussion of scope of application, and unique contribution to field | Integration with previous work, implications, and transferability: Pages 25-26              |
| Limitations                                                | Trustworthiness and limitations of findings                                                                                                                          | Strengths and Limitations: Pages 26-27                                                      |
| Conflicts of interest                                      | Potential sources of influence on study conduct and conclusions                                                                                                      | Conflicts of interest: Page 28                                                              |
| Funding                                                    | Sources of funding and other support                                                                                                                                 | Funding: Page 28                                                                            |

---
